# Supplementary material
Source: publisher site journal article supplement (https://www.dovepress.com/article/609054)
Supplement: Supplementary file 1 [file 609054%20Revised%20Supplementary%20Tables.docx]

**Table S1.** Demographic, diagnostic, procedural, medication, visit, and laboratory codes utilized in the definition of the cohorts.

| **Category** | **Code** | **Description** |
| --- | --- | --- |
| **Index drug** | | |
| medication | NLM:ATC:A10BJ | Glucagon-like peptide-1 (GLP-1) analogues |
| medication | NLM:RXNORM:2601723 | tirzepatide |
| **Other weight loss medication** | | |
| medication | NLM:RXNORM:37925 | orlistat |
| medication | NLM:RXNORM:2469247 | setmelanotide |
| medication | NLM:RXNORM:42347 | bupropion |
| medication | NLM:RXNORM:7243 | naltrexone |
| medication | NLM:RXNORM:8152 | phentermine |
| medication | NLM:RXNORM:38404 | topiramate |
| **COPD AND Obesity** | | |
| diagnosis | UMLS:ICD10CM:J44 | Other chronic obstructive pulmonary disease |
| diagnosis | UMLS:ICD10CM:J41 | Simple and mucopurulent chronic bronchitis |
| diagnosis | UMLS:ICD10CM:J42 | Unspecified chronic bronchitis |
| diagnosis | UMLS:ICD10CM:J43 | Emphysema |
| laboratory | TNX:9083 | BMI (at least 30.00 kg/m2) |
| diagnosis | UMLS:ICD10CM:E66 | Overweight and obesity |
| diagnosis | UMLS:ICD10CM:E66.01 | Morbid (severe) obesity due to excess calories |
| **Exclusion criteria** | | |
| diagnosis | UMLS:ICD10CM:E08-E13 | Diabetes mellitus |
| diagnosis | UMLS:ICD10CM:Z94 | Transplanted organ and tissue status |
| diagnosis | UMLS:ICD10CM:N18.6 | End stage renal disease |
| diagnosis | UMLS:ICD10CM:Z99.2 | Dependence on renal dialysis |
| diagnosis | UMLS:ICD10CM:Z49.31 | Encounter for adequacy testing for hemodialysis |
| diagnosis | UMLS:ICD10CM:Z49.32 | Encounter for adequacy testing for peritoneal dialysis |

**Table S2.** Definitions of covariates coding used in this study.

| **Code** | **Description** |
| --- | --- |
| AI | Age at Index |
| F | Female |
| 2054-5 | Black or African American |
| M | Male |
| 2106-3 | White |
| 1002-5 | American Indian or Alaska Native |
| UNK | Unknown Race |
| 2076-8 | Native Hawaiian or Other Pacific Islander |
| UN | Unknown Ethnicity |
| 2186-5 | Not Hispanic or Latino |
| 2135-2 | Hispanic or Latino |
| 2131-1 | Other Race |
| 2028-9 | Asian |
| Z72.0 | Tobacco use |
| F10 | Alcohol related disorders |
| I20-I25 | Ischemic heart diseases |
| I50 | Heart failure |
| N18 | Chronic kidney disease (CKD) |
| J44.1 | Chronic obstructive pulmonary disease with (acute) exacerbation |
| K70-K77 | Diseases of liver |
| I60-I69 | Cerebrovascular diseases |
| Z90.81 | Acquired absence of spleen |
| B20 | Human immunodeficiency virus [HIV] disease |
| R03BA | Glucocorticoids |
| R03BB | Anticholinergics |
| 10368 | terbutaline |
| 1114326 | indacaterol |
| 1546059 | olodaterol |
| 25255 | formoterol |
| 36117 | salmeterol |
| 4333 | fenoterol |
| 435 | albuterol |
| 41126 | fluticasone |
| 19831 | budesonide |
| 108118 | mometasone |
| 1347 | beclomethasone |
| 1424884 | vilanterol |
| 1487514 | umeclidinium |
| 1546438 | glycopyrronium |
| 69120 | tiotropium |
| 2102775 | revefenacin |
| 1303098 | aclidinium |
| 9083 | BMI, 30 - 0 kg/m2 |

**Table S3.** Definitions of outcomes coding used in this study.

| **Code** | **Description** |
| --- | --- |
| **1#: All-cause mortality** | |
| Deceased | Deceased |
| UMLS:ICD10CM:R99 | Ill-defined and unknown cause of mortality |
| **2#: COPD exacerbation** | |
| UMLS:ICD10CM:J44.0 | Chronic obstructive pulmonary disease with (acute) lower respiratory infection |
| UMLS:ICD10CM:J44.1 | Chronic obstructive pulmonary disease with (acute) exacerbation |
| **3#: Acute respiratory failure** | |
| UMLS:ICD10CM:J96.0 | Acute respiratory failure |
| UMLS:SNOMED:112798008 | Insertion of endotracheal tube |
| UMLS:CPT:31500 | Intubation, endotracheal, emergency procedure |
| UMLS:SNOMED:1149092001 | Positive pressure ventilation |
| UMLS:ICD10PCS:5A1935Z | Respiratory Ventilation, Less than 24 Consecutive Hours |
| UMLS:ICD10PCS:5A1945Z | Respiratory Ventilation, 24-96 Consecutive Hours |
| UMLS:ICD10PCS:5A1955Z | Respiratory Ventilation, Greater than 96 Consecutive Hours |
| UMLS:ICD10PCS:5A19 | Physiological Systems / Performance / Respiratory |
| UMLS:ICD10PCS:5A09357 | Assistance with Respiratory Ventilation, Less than 24 Consecutive Hours, Continuous Positive Airway Pressure |
| UMLS:ICD10PCS:5A09358 | Assistance with Respiratory Ventilation, Less than 24 Consecutive Hours, Intermittent Positive Airway Pressure |
| UMLS:ICD10PCS:5A09359 | Assistance with Respiratory Ventilation, Less than 24 Consecutive Hours, Continuous Negative Airway Pressure |
| UMLS:ICD10PCS:5A0935A | Assistance with Respiratory Ventilation, Less than 24 Consecutive Hours, High Flow/Velocity Cannula |
| UMLS:ICD10PCS:5A0935B | Assistance with Respiratory Ventilation, Less than 24 Consecutive Hours, Intermittent Negative Airway Pressure |
| UMLS:ICD10PCS:5A0935Z | Assistance with Respiratory Ventilation, Less than 24 Consecutive Hours |
| UMLS:ICD10PCS:5A09457 | Assistance with Respiratory Ventilation, 24-96 Consecutive Hours, Continuous Positive Airway Pressure |
| UMLS:ICD10PCS:5A09458 | Assistance with Respiratory Ventilation, 24-96 Consecutive Hours, Intermittent Positive Airway Pressure |
| UMLS:ICD10PCS:5A09459 | Assistance with Respiratory Ventilation, 24-96 Consecutive Hours, Continuous Negative Airway Pressure |
| UMLS:ICD10PCS:5A0945A | Assistance with Respiratory Ventilation, 24-96 Consecutive Hours, High Flow/Velocity Cannula |
| UMLS:ICD10PCS:5A0945B | Assistance with Respiratory Ventilation, 24-96 Consecutive Hours, Intermittent Negative Airway Pressure |
| UMLS:ICD10PCS:5A0945Z | Assistance with Respiratory Ventilation, 24-96 Consecutive Hours |
| UMLS:ICD10PCS:5A09557 | Assistance with Respiratory Ventilation, Greater than 96 Consecutive Hours, Continuous Positive Airway Pressure |
| UMLS:ICD10PCS:5A09558 | Assistance with Respiratory Ventilation, Greater than 96 Consecutive Hours, Intermittent Positive Airway Pressure |
| UMLS:ICD10PCS:5A09559 | Assistance with Respiratory Ventilation, Greater than 96 Consecutive Hours, Continuous Negative Airway Pressure |
| UMLS:ICD10PCS:5A0955A | Assistance with Respiratory Ventilation, Greater than 96 Consecutive Hours, High Flow/Velocity Cannula |
| UMLS:ICD10PCS:5A0955B | Assistance with Respiratory Ventilation, Greater than 96 Consecutive Hours, Intermittent Negative Airway Pressure |
| UMLS:ICD10PCS:5A0955Z | Assistance with Respiratory Ventilation, Greater than 96 Consecutive Hours |
| UMLS:ICD10PCS:0BH1 | Respiratory System / Insertion / Trachea |
| **4#: Pneumonia** | |
| UMLS:ICD10CM:J18 | Pneumonia, unspecified organism |
| **5#: MACE, Major adverse cardiovascular events** | |
| UMLS:ICD10CM:I21 | Acute myocardial infarction |
| UMLS:ICD10CM:I22 | Subsequent ST elevation (STEMI) and non-ST elevation (NSTEMI) myocardial infarction |
| UMLS:ICD10CM:I61 | Nontraumatic intracerebral hemorrhage |
| UMLS:ICD10CM:I62 | Other and unspecified nontraumatic intracranial hemorrhage |
| UMLS:ICD10CM:I63 | Cerebral infarction |
| UMLS:ICD10CM:I65 | Occlusion and stenosis of precerebral arteries, not resulting in cerebral infarction |
| UMLS:ICD10CM:I66 | Occlusion and stenosis of cerebral arteries, not resulting in cerebral infarction |
| UMLS:ICD10CM:I67.89 | Other cerebrovascular disease |
| UMLS:ICD10CM:I50.21 | Acute systolic (congestive) heart failure |
| UMLS:ICD10CM:I50.23 | Acute on chronic systolic (congestive) heart failure |
| UMLS:ICD10CM:I50.31 | Acute diastolic (congestive) heart failure |
| UMLS:ICD10CM:I50.33 | Acute on chronic diastolic (congestive) heart failure |
| UMLS:ICD10CM:I50.41 | Acute combined systolic (congestive) and diastolic (congestive) heart failure |
| UMLS:ICD10CM:I50.43 | Acute on chronic combined systolic (congestive) and diastolic (congestive) heart failure |
| UMLS:ICD10CM:I47.0 | Re-entry ventricular arrhythmia |
| UMLS:ICD10CM:I47.2 | Ventricular tachycardia |
| UMLS:ICD10CM:I49.0 | Ventricular fibrillation and flutter |
| UMLS:ICD10CM:I49.3 | Ventricular premature depolarization |
| UMLS:ICD10CM:I46.2 | Cardiac arrest due to underlying cardiac condition |
| UMLS:ICD10CM:I46.9 | Cardiac arrest, cause unspecified |

ICD10CM, International Classification of Diseases, Tenth Revision, Clinical Modification

NLM, National Library of Medicine

RXNORM, medical prescription normalized

UMLS, Unified Medical Language System

**Table S4.** Primary Outcome Stratified by Individual Weight Loss Medications

| Subgroup analysis | GLP-1RA group (n/N) | Other weight loss medication group (n/N) | Hazard ratio (95% CI) | P value |
| --- | --- | --- | --- | --- |
| Bupropion | 202/7,414 | 492/7,422 | 0.38 (0.33 – 0.45) | < 0.0001 |
| Topiramate | 111/4,197 | 209/4,197 | 0.51 (0.40 – 0.64) | < 0.0001 |
| Phentermine | 36/2,002 | 54/2,005 | 0.65 (0.43 – 1.00) | 0.0457 |
| Naltrexone | 53/1,817 | 73/1,822 | 0.72 (0.51 – 1.03) | 0.0690 |

**Table S5.** Sensitivity analysis for risk of primary outcome using landmark analysis.

| Sensitivity analysis | GLP-1RA group (n/N) | Other weight loss medication group (n/N) | Hazard ratio (95% CI) | P value |
| --- | --- | --- | --- | --- |
| 90-days to 1-year | 132/10,335 | 329/10,381 | 0.38 (0.31 – 0.46) | < 0.0001 |
| 90-days to 2-year | 200/10,335 | 452/10,381 | 0.41 (0.35 – 0.49) | < 0.0001 |
| 90-days to 3-year | 237/10,335 | 519/10,381 | 0.43 (0.37 – 0.50) | < 0.0001 |

**Table S6.** Hazard ratios for negative outcomes between the GLP-1RA group and the control group.

| Outcomes | Hazard ratio (95% CI) | P value |
| --- | --- | --- |
| Acute appendicitis | 1.54 (0.81,2.93) | 0.181 |
